# Supplementary material
Source: publisher figshare collection journal article supplement (https://acs.figshare.com/ndownloader/files/36017956)
Supplement: Supplementary file 1 [file 36017956]

## Supporting Information

### One-step Synthesis of Polypyrrole Nanofiber Assemblies with Enhanced Electronic Properties: Implications for The Next-generation Organic Electronics

*Yang Liu, \* Lin Xiao, Pengfei Yin, Chao Zhang\**

Dr. Liu, Y.; Dr. Xiao, L.; Mr. Yin, P.; Prof. Zhang, C.

Department of Biomedical Engineering, Sun Yat-sen University, Shenzhen, 518107, China

E-mail: liuyang56@mail.sysu.edu.cn; zhchao9@mail.sysu.edu.cn.

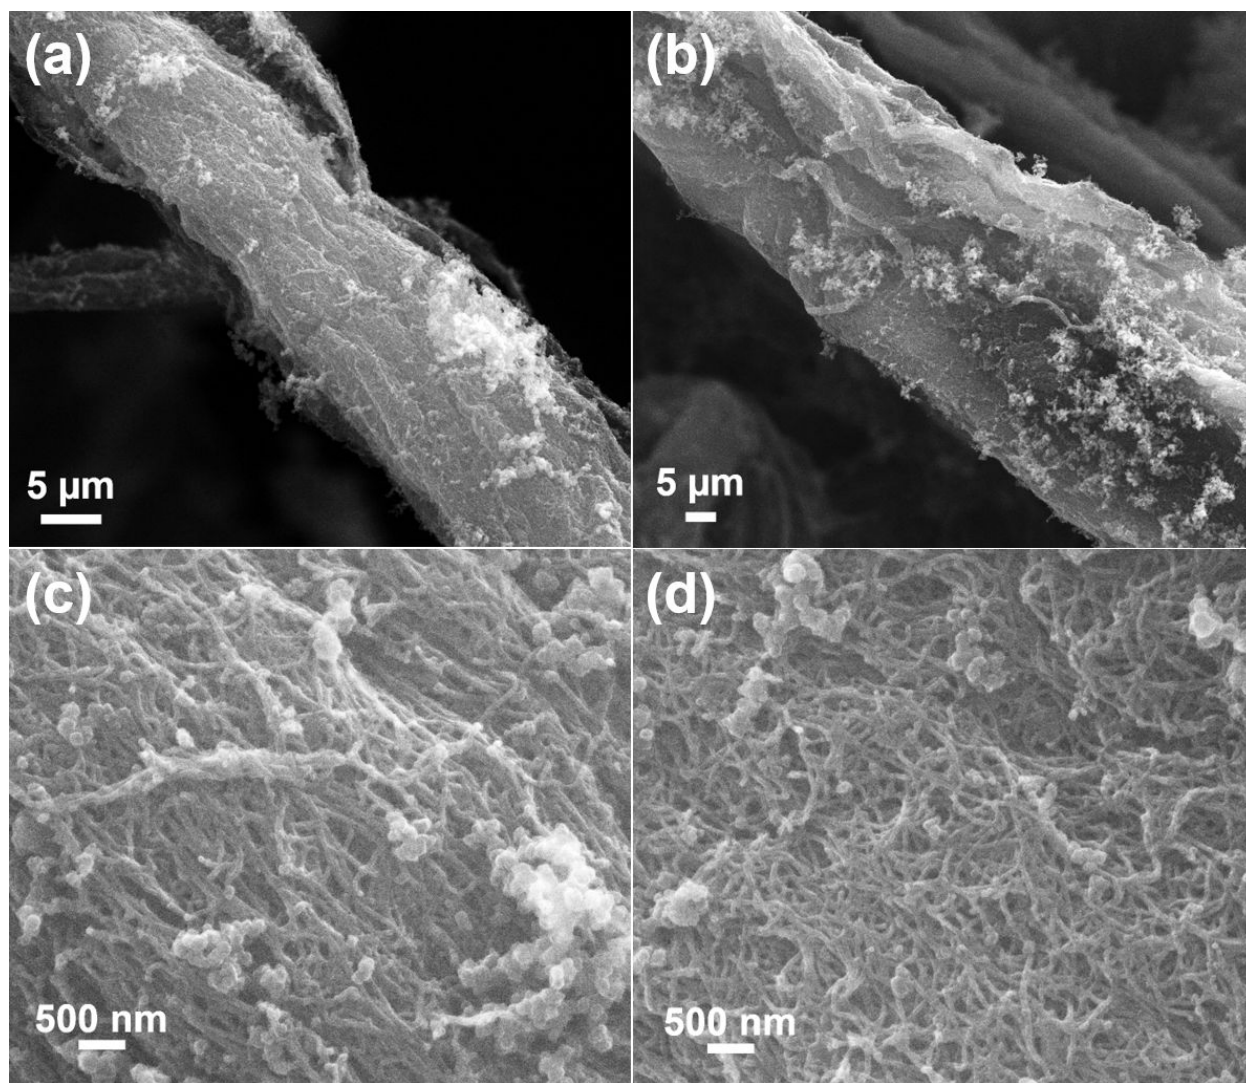

**Figure S1.** SEM images of the Ppy NF-BFs obtained by the self-assembly of Ppy NFs. (a) shows a Ppy NF-BF with a more homogeneous surface microstructure, while (b) shows a Ppy NF-BF with a more heterogeneous surface microstructure. (c) is obtained from (a) in high magnification, showing the basic structural components of the Ppy NF-BF is the Ppy NFs. (d) is the magnified view from (b), which also shows the Ppy NF-BF is assembled by the Ppy NFs.

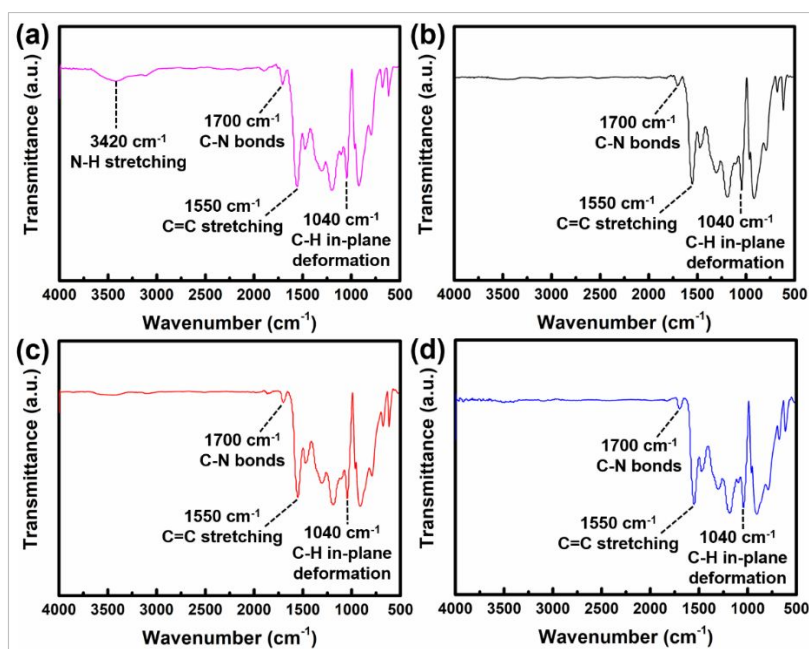

**Figure S2.** FTIR spectra of (a) Ppy NF, (b) Ppy NF synthesized by adding PEG-1000 (Ppy NF-BF), (c) Ppy synthesized by adding PEG-2000, and (d) Ppy synthesized by adding PEG-4000. The major peaks correspond to Ppy are indexed in the spectra.

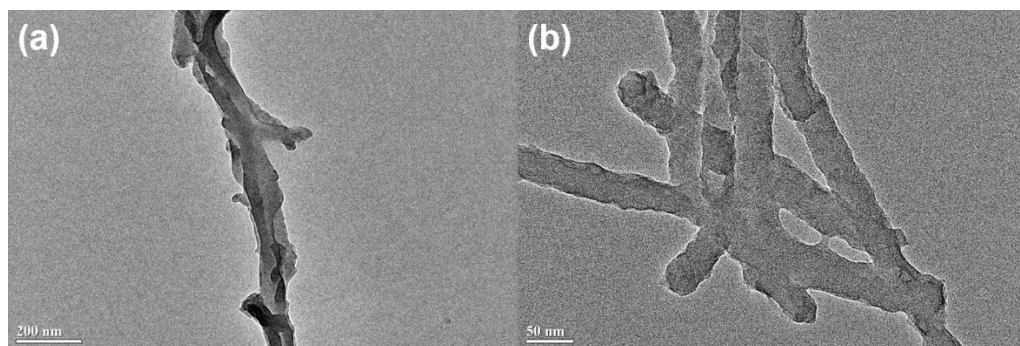

**Figure S3.** TEM (a) and magnified TEM (b) images of the Ppy NF bundles obtained by bath sonicating Ppy NF-BF in ethanol.

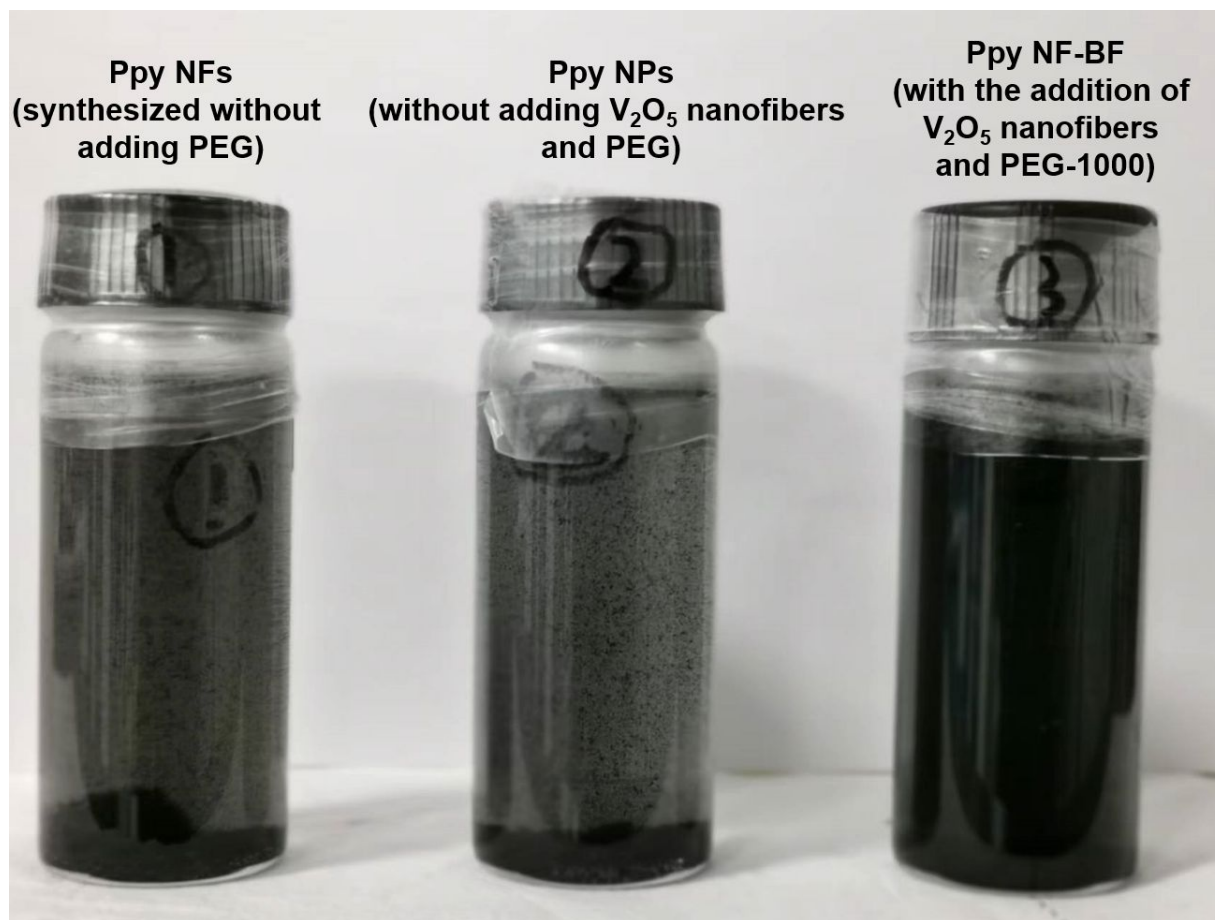

**Figure S4.** Photograph showing the water dispersion of Ppy NFs, Ppy NPs, and Ppy NF-BF.

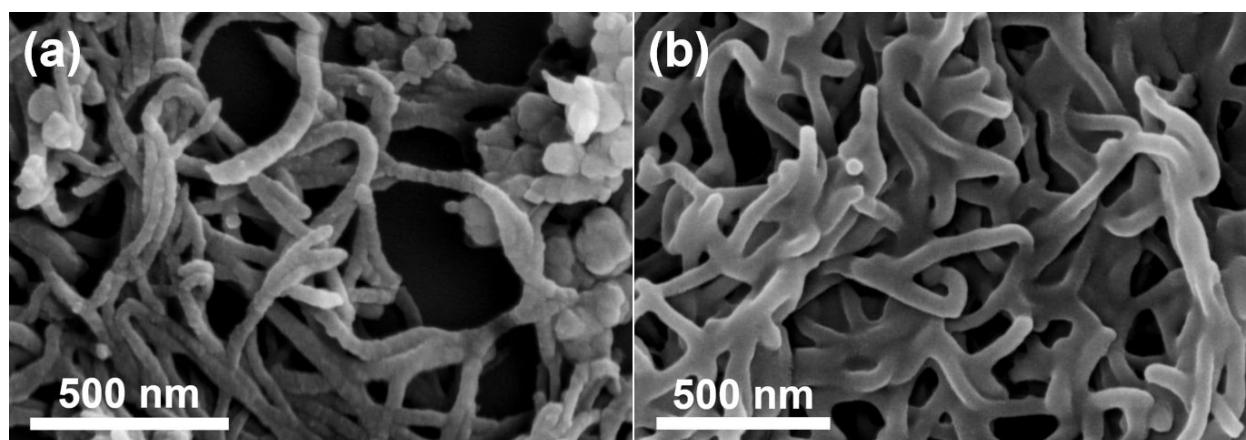

**Figure S5.** Top-down view of the morphologies of the dispersed phases of (a) Ppy NFs and (b) Ppy NF-BF aqueous dispersion after the bath-sonication process.

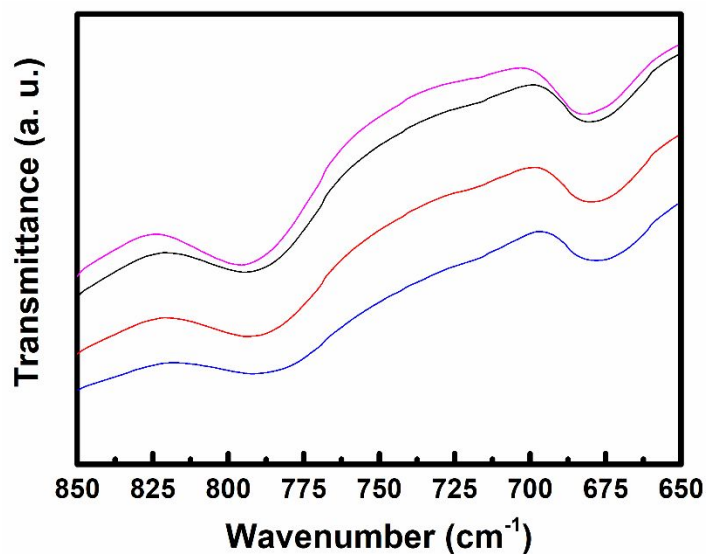

**Figure S6.** FTIR spectra between 850  $\text{cm}^{-1}$  and 650  $\text{cm}^{-1}$  of Ppy NF (purple), Ppy NF synthesized by adding PEG-1000 (Ppy NF-BF, black), (c) Ppy synthesized by adding PEG-2000 (red), and (d) Ppy synthesized by adding PEG-4000 (blue).

**Table S1.** N, O atomic proportions of the as-synthesized Ppy NFs without/with the addition of PEG of different molecular weights.

| Sample                   | N (atomic%) | O (atomic%) | N/O ratio |
|--------------------------|-------------|-------------|-----------|
| Ppy NFs                  | 13.89       | 14.21       | 0.98      |
| Ppy NF-BF (add PEG-1000) | 16.18       | 14.43       | 1.12      |
| Ppy NF-PEG (2000)        | 15.43       | 14.83       | 1.04      |
| Ppy NF-PEG (4000)        | 15.23       | 15.11       | 1.01      |

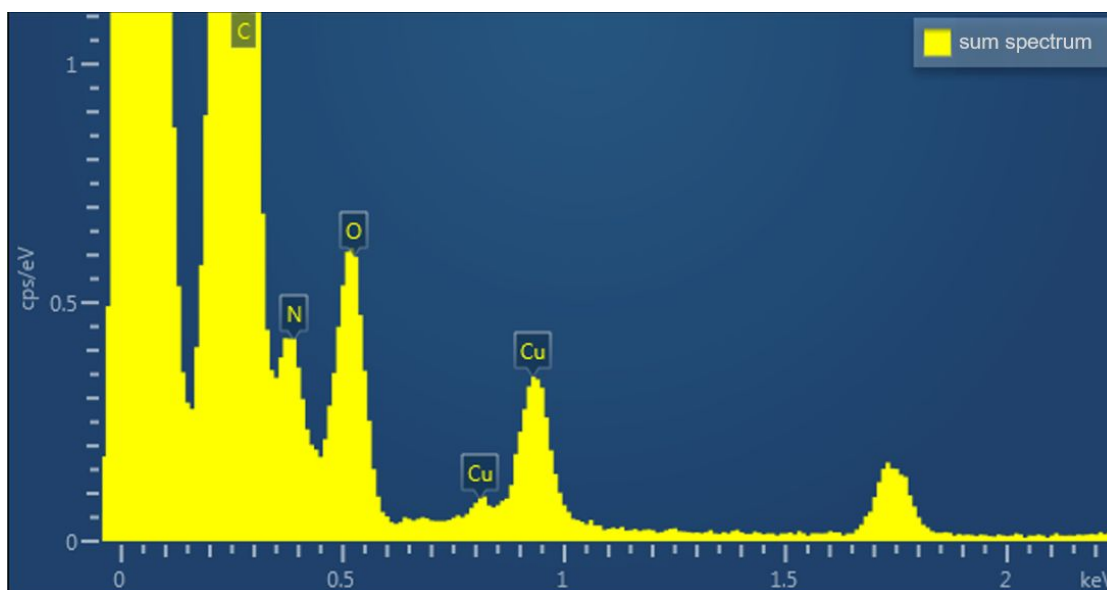

**Figure S7.** EDX sum spectrum of the mapping area shown in Figure 3.

**Table S2.** Elemental analysis result of the EDX spectrum shown in Figure S7.

| Element | k factor | Absorption<br>correction | Weight<br>percentage (%) |
|---------|----------|--------------------------|--------------------------|
| C       | 3.115    | 1.09                     | 79.90                    |
| N       | 1.807    | 1.58                     | 5.48                     |
| O       | 1.455    | 1.28                     | 5.93                     |
| Cu      | 1.421    | 0.98                     | 8.69                     |
| Total   |          |                          | 100.00                   |



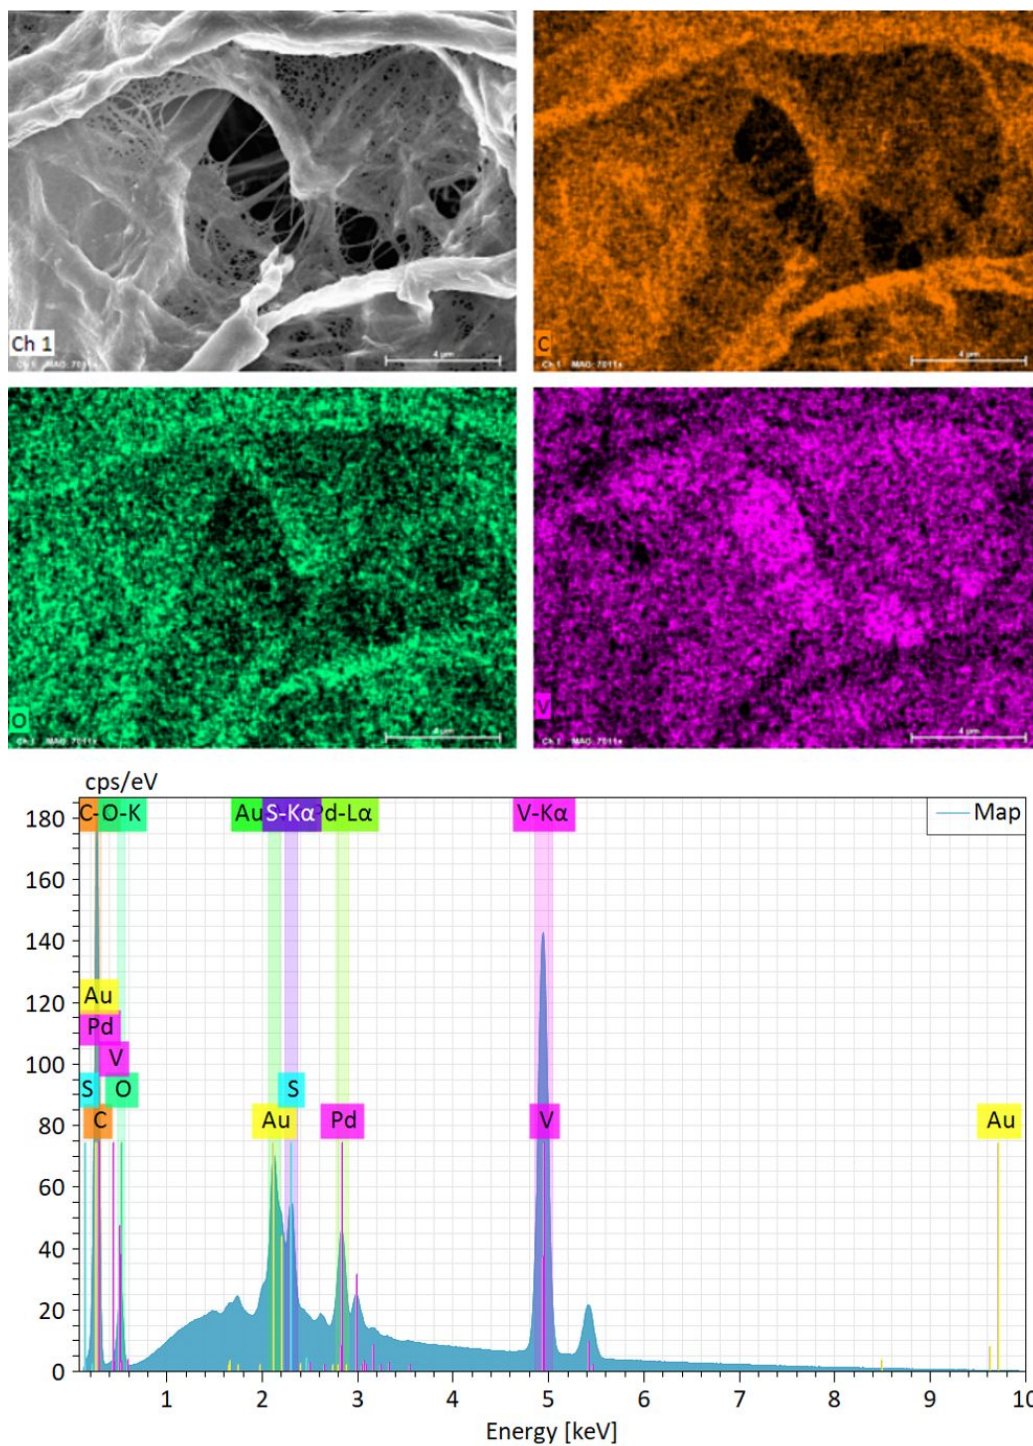

**Figure S8.** EDX mapping results for the freeze-dried PEG-1000/V<sub>2</sub>O<sub>5</sub> sample.

**Table S3.** Elemental compositions of the EDX mapping area.

| Element | Normalization mass<br>percentage (%) | Atomic percentage<br>(%) | Absorbance error<br>(%) |
|---------|--------------------------------------|--------------------------|-------------------------|
| V       | 60.37                                | 41.69                    | 1.66                    |
| O       | 18.74                                | 41.21                    | 1.69                    |
| Au      | 8.43                                 | 1.51                     | 0.27                    |
| Pd      | 6.49                                 | 2.15                     | 0.19                    |
| C       | 3.76                                 | 11.01                    | 0.36                    |
| S       | 2.22                                 | 2.43                     | 0.09                    |

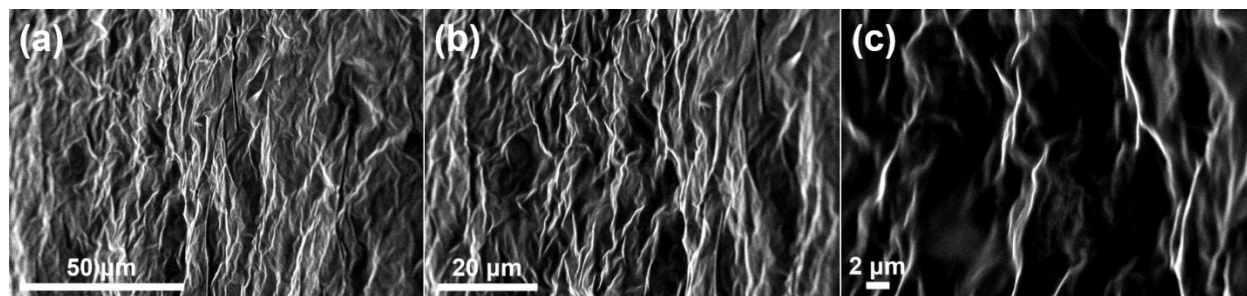**Figure S9.** (a) Cross-sectional view of the freeze-dried PEG-1000/V<sub>2</sub>O<sub>5</sub> gels. (b) Magnified SEM image of (a) shows the stacking layers of the dried gels. (c) High-magnification image shows the layers are stacked parallelly.**Table S4.** Particle size distributions and zeta potentials of the water dispersions (concentration = 0.3 mg mL<sup>-1</sup>) of Ppy NF and Ppy NF synthesized by adding PEG with different molecular weights.

| Sample                      | T (°C) | Average particle size<br>(Z-average, nm) | Polydispersity<br>index (PDI) | Zeta potential<br>(ζ, mV) |
|-----------------------------|--------|------------------------------------------|-------------------------------|---------------------------|
| Ppy granules                | 25     | 1470                                     | 0.290                         | +15.6                     |
| Ppy NFs                     | 25     | 1467                                     | 0.236                         | +18.5                     |
| Ppy NF-BF (add<br>PEG-1000) | 25     | 849.8                                    | 0.109                         | +24.7                     |
| Ppy NF-PEG (2000)           | 25     | 1231                                     | 0.390                         | +20.0                     |
| Ppy NF-PEG (4000)           | 25     | 1423                                     | 0.560                         | +21.0                     |

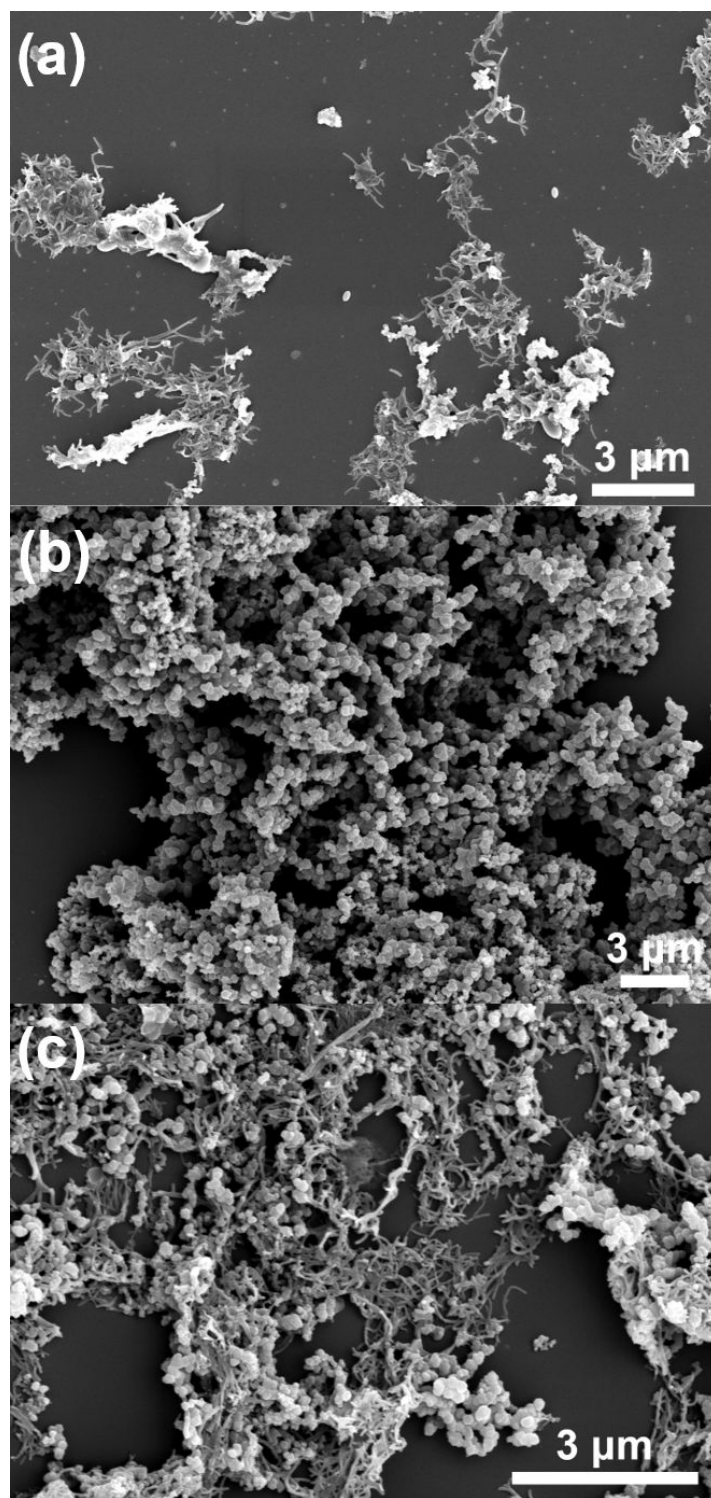

**Figure S10.** SEM images of the air-dried products of the (a) Ppy NF-BF dispersion, (b) Ppy NP dispersion, and (c) Ppy NF dispersion, where the sizes and distributions of the dispersed phase can be observed.



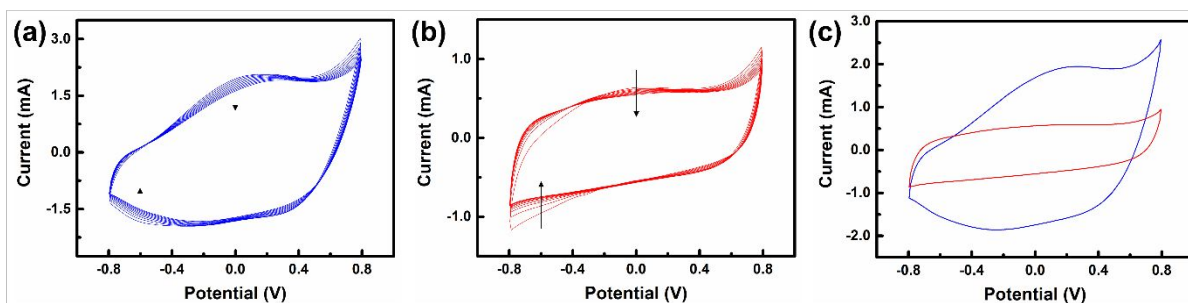

**Figure S11.** Cyclic voltammograms (CV) of (a) Ppy NF-BF and (b) Ppy NFs (10 cycles in total) in 0.1 M KCl, scan rate: 20 mV s<sup>-1</sup>. The cycling direction and the redox peak positions are marked as black arrows. The peak corresponds to the doping process is centered at -0.05 V, while the peak corresponds to the de-doping process is centered at -0.6 V. (c) Comparison between the CV curves of Ppy NF-BF and Ppy NFs.

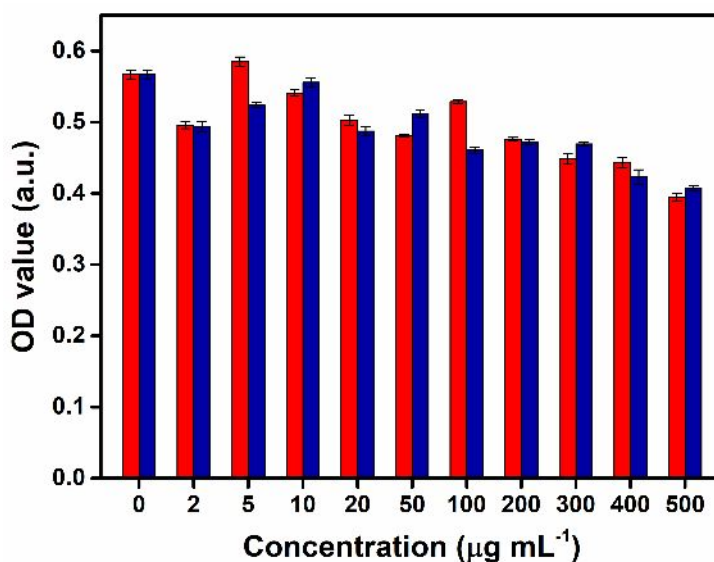

**Figure S12.** MTT test results of Ppy NFs (red column) and Ppy NF-BF (blue column) with respect to Schwann cells.

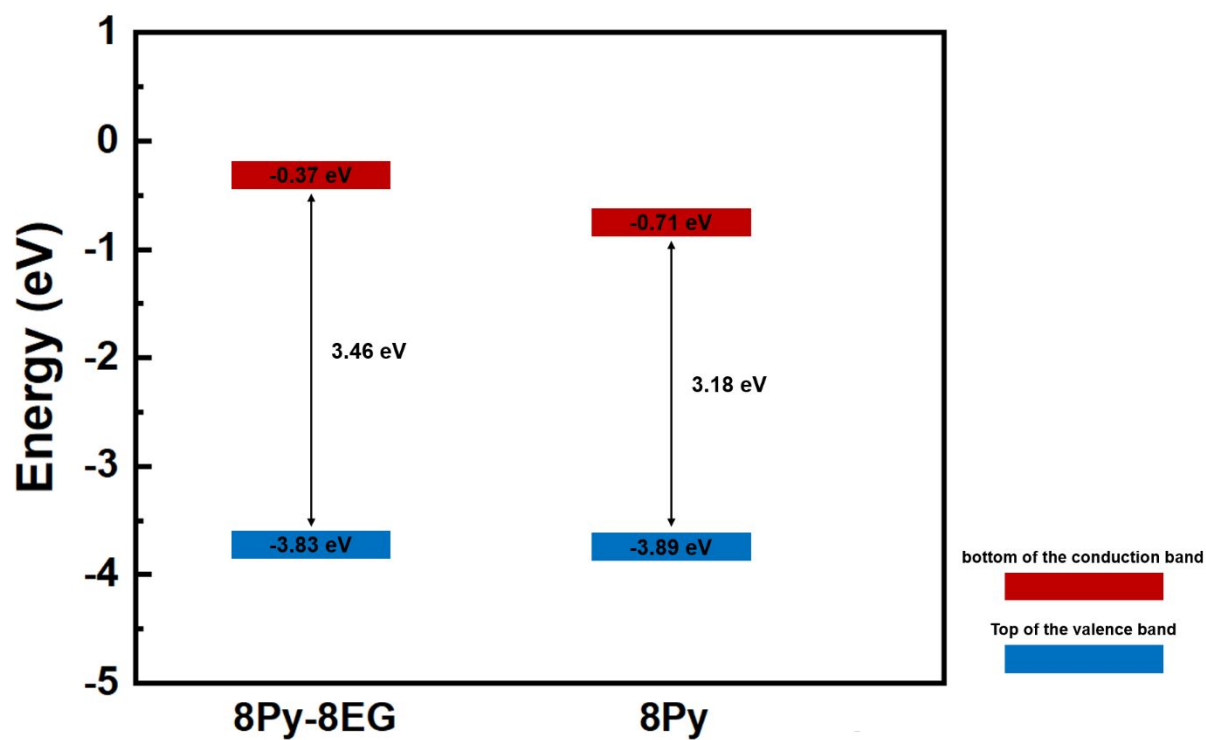

Figure S13. Energy diagram of the 8Py-8EG complex and 8Py oligomer.
